# Supplementary material for: The differential expression of PilY1 proteins by the HsfBA phosphorelay allows twitching motility in the absence of exopolysaccharides
Source: PLoS Genet. 2022 Apr 29;18(4):e1010188. doi: 10.1371/journal.pgen.1010188 (PMC9109919; doi:10.1371/journal.pgen.1010188)
Supplement: S4 Table — (XLSX) [file pgen.1010188.s023.xlsx]

## Sheet: Export Summary
	Numbers Sheet Name	Numbers Table Name	Excel Worksheet Name
	TB DepsW
		Table 1	TB DepsW
	qRT-PCR
		Table 1	qRT-PCR
	Swarm pilY1 mutants
		Table 1	Swarm pilY1 mutants
	Dot blot
		Table 1	Dot blot
	TB pilY1 mutants
		Table 1	TB pilY1 mutants

## Sheet: TB DepsW
strains	wt	ΔepsW	ΔepsW hsfA*1	ΔepsW hsfB*1	ΔepsW hsfB*2	ΔepsW ΔhsfA	ΔepsW ΔhsfB	ΔepsW pilY1*	ΔepsW pilW*	ΔepsW ΔpilY1	ΔepsW ΔpilW
	100	10.3448	10.9541	12.5654	12.0419	5.098	7.45094	10.8808	12.1019	7.32394	13.9919
	100	8.29016	6.66665	13.6126	12.5654	8.62742	6.27447	13.089	14.1361	5.88232	12.2807
average	100	9.31749	8.81036	13.089	12.3037	6.86271	6.86271	11.9849	13.119	6.60313	13.1363
SD	0	1.45287	3.03166	0.740426	0.370213	2.49567	0.831891	1.56142	1.43841	1.01938	1.20999

## Sheet: qRT-PCR
gene	condition	expression	sd		Target	Sample	Control	Expression	Expression SEM	Corrected Expression SEM	Mean Cq	sd
pilY1.1	wt	1	0.140206		PilY1.1	ΔhsfA		0.472219	-1.08247	0.0592947	0.0593666	0.024207
pilY1.2	wt	1	0.0978174			WT	C	1	0.135783	0.135783	30.2109	0.0959014
pilY1.3	wt	1	0.380043		PilY1.2	ΔhsfA		0.95102	0.204274	0.204274	33.0878	0.1347
pilY1.1	hsfA	0.438437	0.0770846			WT	C	1	0.222838	0.222838	33.1235	0.0978174
pilY1.2	hsfA	0.95102	0.1347		PilY1.3	ΔhsfA		6.38516	1.7927	1.79492	21.1617	0.297545
pilY1.3	hsfA	6.38516	0.297545			WT	C	1	0.389577	0.389577	23.9988	0.380043

## Sheet: Swarm pilY1 mutants
	initial size	Replicate 1	Replicate 2	Replicate 3	Spreading 48H (total)	spreading diameter	sd
wt	6	20	22.5	21	21.1667	15.1667	1.25831
	6	8.70607	7.67993	7.08046	7.82215	1.82215	0.822084
ΔpilY1.1	6	16.7547	17.6172	13.4636	15.9452	9.94518	2.19195
ΔpilY1.2	6	21.9623	22.0093	20.8391	21.6035	15.6035	0.662457
ΔpilY1.3	6	20.7547	22.1565	22.1533	21.6882	15.6882	0.808382
ΔpilY1.1 ΔpilY1.2	6	16.9811	16.6112	16.0651	16.5525	10.5525	0.460815
ΔpilY1.2 ΔpilY1.3	6	22.0377	22.1074	19.1226	21.0893	15.0893	1.70352
ΔpilY1.1 ΔpilY1.3	6	9.0566	8.36696	7.29502	8.23953	2.23953	0.887679
ΔpilY1.1 ΔpilY1.2 ΔpilY1.3	6	9.84151	7.72901	6.89272	8.15441	2.15441	1.51973

## Sheet: Dot blot
	replicate 1	replicate 2	averagge	sd
hsfA	6.20515	6.54187	6.37351	0.168357
pilY1.1	2.46108	4.38342	3.42225	0.961171

## Sheet: TB pilY1 mutants
samples	EPS	sd
wt	100	1.65
pilA	7.06	1.3
pilY1.1	82.08	1.3
pilY1.2	86.53	5.86
pilY1.3	96.74	3.42
pilY1.1 pilY1.2	77.56	2.01
pilY1.1 pilY1.3	13.7	1.96
pilY1.2 pilY1.3	92.41	0.76
pilY1.1 pilY1.2 pilY1.3	11.95	0.53
take duplicate	wt	ΔpilA	pilY1.1	pilY1.2	pilY1.3	pilY1.1 pilY1.2	pilY1.1 pilY1.3	pilY1.2 pilY1.3	pilY1.1 pilY1.2 pilY1.3
	100	7.97546	81.1639	90.6738	94.3182	78.9773	12.3223	91.8728	12.3223
	100	6.13497	83.0015	82.3864	99.1573	76.1402	15.0877	92.9412	11.5789
average	100	7.05521	82.0827	86.5301	96.7377	77.5587	13.705	92.407	11.9506
sd	0	1.30142	1.29943	5.86012	3.42178	2.0061	1.95544	0.75546	0.525629
